# 1 Genomic Perspectives on the Emerging SARS-CoV-2 Omicron 2 Variant

3 Wentai Ma<sup>1,2,#</sup>, Jing Yang<sup>1,2,#</sup>, Haoyi Fu<sup>1,2</sup>, Chao Su<sup>3</sup>, Caixia Yu<sup>4</sup>, Qihui Wang<sup>3</sup>, Ana  
4 Tereza Ribeiro de Vasconcelos<sup>5</sup>, Georgii A. Bazykin<sup>6,7</sup>, Yiming Bao<sup>2,4</sup>, Mingkun  
5 Li<sup>1,2,8,\*</sup>

6

7 <sup>1</sup> CAS Key Laboratory of Genomic and Precision Medicine, Beijing Institute of  
8 Genomics, Chinese Academy of Sciences, and China National Center for  
9 Bioinformation, Beijing 100101, China

10 <sup>2</sup>University of Chinese Academy of Sciences, Beijing 100049, China

11 <sup>3</sup>CAS Key Laboratory of Pathogenic Microbiology and Immunology, Institute of  
12 Microbiology, Chinese Academy of Sciences, Beijing 100101, China

13 <sup>4</sup>National Genomics Data Center, Beijing Institute of Genomics, Chinese Academy of  
14 Sciences / China National Center for Bioinformation Beijing 100101, China

15 <sup>5</sup>Laboratório de Bioinformática, Laboratório Nacional de Computação Científica,  
16 Petrópolis 25651-075, Brazil

17 <sup>6</sup>Skolkovo Institute of Science and Technology, Moscow 121205, Russia

18 <sup>7</sup>Kharkevich Institute for Information Transmission Problems of the Russian Academy  
19 of Sciences, Moscow 127051, Russia

20 <sup>8</sup>Center for Excellence in Animal Evolution and Genetics, Chinese Academy of  
21 Sciences, Kunming 650201, China

22 <sup>#</sup> Equal contribution.

23 <sup>\*</sup> Corresponding author.

24 E-mail: [limk@big.ac.cn](mailto:limk@big.ac.cn) (Li M)

25

26 Running title: Ma W et al / Genomic Perspective on Omicron

27

28 The total number of letters in article title: 56

- 29    The total number of letters in running title: 35
- 30    The total number of words in abstract: 249
- 31    The total number of keywords: 5
- 32    The total number of word (from “Introduction” to “ORCID”): 3225
- 33    The total number of reference count: 38
- 34    The total number of figures: 4
- 35    The total number of tables: 0
- 36    The total number of supplementary figures: 2
- 37    The total number of supplementary tables: 1
- 38

## 39 Abstract

40 A new variant of concern for SARS-CoV-2, Omicron (B.1.1.529), was designated by  
 41 the World Health Organization on November 26, 2021. This study analyzed the viral  
 42 genome sequencing data of 108 samples collected from patients infected with  
 43 Omicron. First, we found that the enrichment efficiency of viral nucleic acids was  
 44 reduced due to mutations in the region where the primers anneal to. Second, the  
 45 Omicron variant possesses an excessive number of mutations compared to other  
 46 variants circulating at the same time (62 vs. 45), especially in the *Spike* gene.  
 47 Mutations in the *Spike* gene confer alterations in 32 amino acid residues, which was  
 48 more than those observed in other SARS-CoV-2 variants. Moreover, a large number  
 49 of nonsynonymous mutations occur in the codons for the amino acid residues located  
 50 on the surface of the Spike protein, which could potentially affect the replication,  
 51 infectivity, and antigenicity of SARS-CoV-2. Third, there are 53 mutations between  
 52 the Omicron variant and its closest sequences available in public databases. Many of  
 53 those mutations were rarely observed in the public database and had a low mutation  
 54 rate. In addition, the linkage disequilibrium between these mutations were low, with a  
 55 limited number of mutations (6) concurrently observed in the same genome,  
 56 suggesting that the Omicron variant would be in a different evolutionary branch from  
 57 the currently prevalent variants. To improve our ability to detect and track the source  
 58 of new variants rapidly, it is imperative to further strengthen genomic surveillance and  
 59 data sharing globally in a timely manner.

60 **Keywords:** Omicron; Genomics; Mutation; Variant of concern; SARS-CoV-2

## 61 Introduction

62 On November 22, 2021, the first genome sequence of a new variant of concern (VOC),  
 63 Omicron (also known as B.1.1.529), was released in GISAID (Global initiative on  
 64 sharing all influenza data) (EPI\_ISL\_6590782) [1]. The sample was obtained from a  
 65 patient who arrived in Hong Kong on November 11 from South Africa via Doha in  
 66 Qatar  
 67 ([https://news.sky.com/story/covid-19-how-the-spread-of-omicron-went-from-patient-](https://news.sky.com/story/covid-19-how-the-spread-of-omicron-went-from-patient-zero-to-all-around-the-globe-12482183)  
 68 [zero-to-all-around-the-globe-12482183](https://news.sky.com/story/covid-19-how-the-spread-of-omicron-went-from-patient-zero-to-all-around-the-globe-12482183)). To date, the first known Omicron variant  
 69 sample was collected on November 5, 2021 in South Africa (EPI\_ISL\_7456440).  
 70 Until December 12, 2021, there were over 2000 Omicron sequences submitted to the  
 71 GISAID from South Africa, Botswana, Ghana, the United Kingdom, and many other  
 72 countries. The emergence of this variant has attracted much attention due to the sheer  
 73 number of mutations in the *Spike* gene, which may affect the viral transmissibility,  
 74 replication, and binding of antibodies, and its dramatic increase in South Africa [2].  
 75 Preliminary studies showed that the new variant could substantially evade immunity  
 76 from prior infection and vaccination [3,4]. Meanwhile, a preprint report proposed that  
 77 the emergence of the Omicron variant was associated with an increased risk of  
 78 SARS-CoV-2 reinfection [5]. However, it is still unclear where the new variant came.

79 In this study, we characterized the genomic features of the Omicron variant using  
 80 data from 108 patients infected with the Omicron variant, which were generated by  
 81 the Network for Genomic Surveillance in South Africa (NGS-SA) [2,6], and we  
 82 speculate that the new variant is unlikely derived from recently discovered variants  
 83 through either mutation or recombination.

## 84 Results

### 85 Reduced enrichment efficiency of the PCR-tiling amplicon protocols on the 86 Omicron variant

87 Of the 207 Omicron samples sequenced, 158 samples had more than 90% of the viral  
 88 genome covered by at least 5-fold, which were used in the subsequent analysis.  
 89 Notably, two sequencing protocols were implemented. The first was to enrich the viral  
 90 genome with the Midnight V6 primer sets followed by sequencing on the GridION  
 91 platform (hereinafter referred to as Midnight,  
 92 [dx.doi.org/10.17504/protocols.io.bwyppfvn](https://doi.org/10.17504/protocols.io.bwyppfvn)). The second protocol involved

93 enrichment by the Artic V4 primer set, and the amplicons were sequenced on the  
94 Illumina MiSeq platform (hereinafter referred to as Artic,  
95 [dx.doi.org/10.17504/protocols.io.bdp7i5rn](https://doi.org/10.17504/protocols.io.bdp7i5rn)). Fifty samples were sequenced using both  
96 protocols, and we found a high consistency in the major allele frequency between the  
97 two protocols (Figure S1). Artic data were preferred due to higher sequencing depth  
98 (median: 191 vs. 250,  $P < 0.01$ , Mann–Whitney U test). Finally, 49 samples  
99 sequenced by the Midnight protocol and 59 samples sequenced by the Artic protocol  
100 were included in the study.

101 Both protocols enabled efficient enrichment of viral nucleic acids from total  
102 RNA, the fraction of SARS-CoV-2 reads in the sequencing data were 84% and 94%,  
103 respectively for the Midnight and the Artic protocol. Although the Artic protocol had a  
104 relatively higher in-target percentage ( $P < 0.001$ , Mann–Whitney U test), the evenness  
105 of the sequencing depth of the SARS-CoV-2 was higher for the Midnight protocol  
106 (variance of the sequencing depth, 0.121 vs. 0.159,  $P < 0.001$ , Mann–Whitney U test).  
107 The sequencing depth profile of the SARS-CoV-2 genome was similar among  
108 samples sequenced by the same protocol but differed markedly between the two  
109 protocols (**Figure 1A**). The sequencing depth varied among different genomic regions,  
110 reflecting the differential enrichment efficiency of the primers. Moreover, we found  
111 that the large number of mutations possessed by the Omicron variant had a significant  
112 impact on the efficiency of the primers. In particular, seven primers in the Artic  
113 protocol were affected by at least one mutation, and three primers in the Midnight  
114 protocol were affected (Figure 1A). The worst coverage of the three regions for  
115 Primers 76, 79, and 90 using the Artic protocol were all associated with the presence  
116 of mutations in the region where these primers annealed to, whose sequencing depths  
117 were reduced by 2586, 246, and 234-fold, respectively, compared to the expected  
118 depth (Figure 1B). Strikingly, five mutations were located at the 5' end of the least  
119 efficient Primer 76. The enrichment efficiency of other four primers (Primers 10, 27,  
120 88, 89) was less affected by the mutations, which showed 1.3, 1.4, 3.4, and 1.9-fold  
121 reductions, respectively. Thus, the results suggest that the Omicron mutations can  
122 decrease the enrichment efficiency by PCR amplification, and there is an urgent need

123 to update the Arctic V4 primers. We noted that the developer of the Artic protocol had  
124 already proposed a solution on this, and all seven affected primers had been updated  
125 (<https://community.artic.network/t/sars-cov-2-v4-1-update-for-omicron-variant/342>).  
126 In contrast, the efficiency of Midnight primers was less influenced by mutations in the  
127 Omicron variant. The three affected primers, Primers 10, 24, 28, showed no reduction,  
128 2-fold, and 28-fold reduction respectively in sequencing depth compared to the  
129 expected depth.

### 130 **An extraordinary number of mutations in the *Spike* gene of the Omicron variant**

131 The number of mutations (with major allele frequency  $\geq 70\%$ ) of the Omicron variant  
132 varied from 61 to 64, and 61 of them were identified in more than 90% of the samples,  
133 which included 54 SNPs, six deletions, and one insertion. All these mutations were  
134 fixed at the individual level (**Figure 2A**). The total number of mutations was  
135 significantly higher than that of other variants detected in South Africa in November  
136 (median 62 vs. 45,  $P < 0.001$ , Mann–Whitney U test). Strikingly, over half of these  
137 mutations (34, 55.7%) were located in the *Spike* gene, whose length was 12.8% of the  
138 whole genome. Moreover, 32 of these mutations were nonsynonymous mutations. The  
139 proportion was significantly higher than that observed in the same region in other  
140 variants (94% vs. 67%,  $P < 0.001$ , Fisher’s exact test,  $Ka/Ks [7] = 8.65$ ), suggesting  
141 positive selection on this gene.

142 The Omicron variant showed a greater number of mutations than other VOCs  
143 (Figure 2B). The difference was more marked in the *Spike* gene, where the Omicron  
144 variant possessed 2-15 times more amino acid changes than other VOCs collected  
145 simultaneously (Figures 2C, D). Strikingly, the divergence in the amino acid sequence  
146 between the Omicron variant and the early SARS-CoV-2 sequence (Wuhan-Hu-1) in  
147 the *Spike* and RBD regions was greater or equivalent to that between SARS-like  
148 coronavirus (Pangolin MP789, Bat BANAL-20-52, and Bat RaTG13) and  
149 Wuhan-Hu-1 [8–12]. The dramatic changes in the *Spike* and RBD regions may  
150 substantially change the antigenicity and susceptibility to pre-existing antibodies.

### 151 **Potential risks associated with Omicron mutations**

152 Most mutations occurred on the surface of the trimeric spike protein, especially in the  
153 RBD region (Figure S2). Eight of the 16 mutations in the RBD (K417N, G446S,

154 E484A, Q493R, G496S, Q498R, N501Y, and Y505H) were located at positions that  
155 were proposed to be critical for viral binding to the host receptor  
156 angiotensin-converting enzyme 2 (ACE2) [13]. Among them, the K417N and N501Y  
157 mutations, which were also identified in the Beta variant, were reported to influence  
158 binding to human ACE2 [14]; N501Y confers a higher affinity of the viral Spike  
159 protein to ACE2 [15]. How the other mutations affect the affinity to ACE2 of humans  
160 and other animal hosts is still unknown.

161 Moreover, some other mutations in the *Spike* gene are known to be associated  
162 with changes in replication and infectivity of the virus. For example,  $\Delta 69-70$  could  
163 enhance infectivity associated with increased cleaved Spike incorporation [16];  
164 P681H could potentially confer replication advantage through increased cleavage  
165 efficacy by furin and adaptation to resist innate immunity [3,17]; H655Y was  
166 suspected to be an adaptive mutation that could increase the infectivity of the virus in  
167 both human and animal models [16]. In addition, mutations in other genes, such as  
168 R203K and G204R in the *Nucleoprotein* gene, could also potentially increase the  
169 infectivity, fitness, and virulence of the virus [18]. Of note, the function of these  
170 mutations was investigated because they were present in other VOCs. The effect of  
171 other less frequent mutations and the combination of the aforementioned mutations on  
172 the biology of the virus warrants further investigation.

173 Mutations in the RBD region, which is the target of many antibodies, may  
174 compromise the neutralization of existing antibodies induced by vaccination or  
175 natural infection [19]. Recent studies have shown severely reduced neutralization of  
176 the Omicron variant by monoclonal antibodies and vaccine sera [4,20,21]. Meanwhile,  
177 preliminary studies suggested that the Omicron variant caused three times more  
178 reinfection than previous strains, further supporting the speculation that the new  
179 variant can evade immunity from prior infection and vaccination [5]. However, the  
180 escape was incomplete, and a vaccine booster shot is likely to provide a high level of  
181 protection against the Omicron variant [4]. Here, we analyzed the epitope regions of  
182 182 protein complex structures of antibodies that bound to SARS-CoV-2 Spike, the  
183 RBD, or NTD from the Protein Data Bank. We found that mutations in the Omicron  
184 variant were enriched in the epitope region of the Spike protein (**Figure 3A**). The  
185 median number of antibodies bound to the Omicron mutation sites was 53, which was  
186 significantly higher than those bound to other positions (median 3,  $P < 0.001$ ,

187 Mann–Whitney U test). Moreover, we found that these mutations could potentially  
188 impact the binding of different classes of antibodies (by analyzing the deep mutational  
189 scanning data [22], Figure 3B), which was classified by the location and conformation  
190 of antibody binding [23], suggesting that the therapeutic strategy of antibody cocktails  
191 may also be affected.

## 192 **Obscure evolutionary trajectory of the Omicron variant**

193 In addition to the 61 shared mutations, some private mutations were identified in  
194 different individuals, ranging from one to three, indicating relatively low population  
195 diversity at the time of sampling (**Figure 4A**). Meanwhile, no obvious clusters were  
196 found in the phylogenetic tree, suggesting that the Omicron variant was still in the  
197 early transmission stage during sampling. The time to the most recent common  
198 ancestor (TMRCA) was estimated to be in the middle of October 2021 (95% highest  
199 density interval: October 7 to 20).

200 To screen for the possible predecessors of the Omicron variant, the 108 Omicron  
201 sequences were used as queries to look for the closest sequences in the public  
202 database, which included more than 5 million sequences released before November 1,  
203 2021. We found three closest sequences to the queries, which differed by 53-56  
204 nucleotides from the Omicron genomes. The three sequences were from lineage B.1.1  
205 and collected between March and June 2020. They all had eight mutations relative to  
206 Wuhan-Hu-1, and seven of the mutations were shared among them (Figure 4A). The  
207 large number of differences suggests that the Omicron lineage was separated from  
208 other lineages a long time ago and has never been sequenced since then. This is an  
209 uncommon situation considering more than 5 million genomes have been sequenced  
210 in over 180 countries and regions. The distribution of the number of differences  
211 between all sequences in the public database and their closest sequences showed that  
212 53-56 is approximately three times higher than the maximum number of differences  
213 observed in the database (20 when at least three sequences were required to eliminate  
214 the influence of sequencing or assembly errors, Figure 4B), again emphasizing the  
215 distinctiveness of the Omicron variant.

216 Most Omicron lineage-specific mutations (52/54) were identified in public  
217 databases (Figure 4C). However, they were unlikely to be presented in one sequence  
218 by chance. First, over half of the mutations were rarely detected in the populations,



219 i.e., 33 mutations were detected in less than 1000 samples out of five million  
220 sequences (16 mutations were detected in less than 100 samples). Second, the  
221 mutation rate (represented by the occurrence number of mutations on the phylogenetic  
222 tree) was extremely low for 13 of the mutations (occurring only once in the evolution  
223 of SARS-CoV-2, mutation rate = 1). Third, the linkage disequilibrium between these  
224 mutations was low, and only four mutation pairs had  $r^2$  greater than 0.8. Moreover, we  
225 further examined whether any combination of these mutations appeared in the  
226 database and found that the maximum number of mutations in the same genome was  
227 six. Therefore, the evolutionary trajectory of the Omicron lineage cannot be resolved  
228 by the current genome data.

## 229 **Discussion**

230 The unique genome features of the Omicron variant make it the most special  
231 SARS-CoV-2 variant to date. The excess number of nonsynonymous mutations in the  
232 Spike gene implies that the Omicron variant might evolve under selection pressure,  
233 which may come from antibodies or adaptation to new hosts. It is speculated that it  
234 may have been incubated in a patient chronically infected with SARS-CoV-2, e.g.,  
235 HIV patients with immunocompromising conditions. This hypothesis was supported  
236 by the accelerated viral evolution observed in immunocompromised patients and has  
237 been previously proposed to explain how the Alpha variant was generated [24,25]  
238 ([https://virological.org/t/preliminary-genomic-characterisation-of-an-emergent-sars-co](https://virological.org/t/preliminary-genomic-characterisation-of-an-emergent-sars-co-v-2-lineage-in-the-uk-defined-by-a-novel-set-of-spike-mutations/563)  
239 [v-2-lineage-in-the-uk-defined-by-a-novel-set-of-spike-mutations/563](https://virological.org/t/preliminary-genomic-characterisation-of-an-emergent-sars-co-v-2-lineage-in-the-uk-defined-by-a-novel-set-of-spike-mutations/563)). If this  
240 hypothesis is true for the Omicron variant, we suspect that the original virus that  
241 infected the patient might still be missing in the database because the current closest  
242 sequences were circulating in population one and a half years ago, the time was too  
243 long, even for a chronic infection. Another hypothesis involves a spillover from  
244 humans to animals and spills back from animals to humans; such a process has been  
245 proposed to be possible in mink [26]. Interestingly, a recent study proposed that the  
246 progenitor of the Omicron variant seemed to have evolved in mice for some time  
247 before jumping back into humans [27]. The binding affinity test between the Omicron  
248 RBD and animal ACE2 may help to test this hypothesis. A third hypothesis is that the  
249 virus split with other variants a long time ago and transmitted cryptically in the  
250 population. Since viral genome surveillance is poor in many countries, it is difficult to  
251 reject this hypothesis, which again underscores the importance of strengthening viral

surveillance on a global scale. Moreover, a hypothesis of acquisition by recombination between different variants is unlikely since the components that make up the Omicron genome could not be found in the current SARS-CoV-2 database, and of course, we cannot reject the possibility that the Omicron genome consists of a combination of components that have not been sequenced. More discussion of the possible origin of the Omicron variant can be found in other studies [28].

Benefiting from the establishment of the viral genome surveillance network and extensive research on the function of viral mutations, it took less than a week to designate the new VOC Omicron since the first identification of its genome, which is much faster than the designation of previous VOCs. However, it will still take several months to verify the risk of the new VOC. There have been over 200,000 new infections per day in the past year. Undoubtedly, we will face more mutant variants in the future, which may result in significant changes in transmissibility, infectivity, and pathogenicity. Unfortunately, it is still impossible to predict the evolutionary direction of the viral genome; hence, we have no hint at what the next VOC will be. To enhance the ability to rapidly respond to the emergence of new VOCs, we should further strengthen genome surveillance on a worldwide scale and develop experimental and computational methods for rapid and high-throughput resolution of mutational functions.

## **Materials and methods**

### **Data collection**

The sequencing data were retrieved from SRA database in NCBI (BioProject: PRJNA784038), which was generated by the Network for Genomic Surveillance in South Africa (NGS-SA) [2,6]. In total 211 samples were downloaded on November 30, 2021 (Table S1). The virus lineage was assigned by Pango [29], four samples that cannot be assigned to the Omicron lineage were discarded. All the remaining 207 samples were assigned to Omicron BA.1.

### **Quality control and mutation detection**

Quality control and adaptor trimming were performed by FASTP [30]. The resultant reads were mapped to Wuhan-Hu-1 (NC\_045512.2) using minimap2 (-ax sr) [31].

283 Primer alignment and trimming were performed by the align\_trim function from Artic  
284 ([https://artic-tools.readthedocs.io/en/latest/commands/#align\\_trim](https://artic-tools.readthedocs.io/en/latest/commands/#align_trim)). The mpileup file  
285 and the read count file were generated by SAMtools [32] and Varscan2 [33]. The  
286 consensus sequence was obtained using the following criteria: 1) depth  $\geq$  5-fold; 2)  
287 frequency of the major allele  $\geq$  70%.

## 288 **Sequence depth analysis**

289 The sequencing depth was calculated for each nonoverlapping window with a size of  
290 100 bp, except for the last window, which ranged from 29801 to 29880 bp. The fold  
291 change of each primer region was calculated by the sum of the depth of all samples in  
292 this region divided by the expected value (assuming no differences among regions).

## 293 **Identification of epitope regions on the Spike Protein**

294 We downloaded the structures of 182 protein complexes of antibodies that bound to  
295 the SARS-CoV-2 *Spike* or its receptor-binding domain (RBD) or N-terminal  
296 domain (NTD) from the Protein Data Bank (all structures available before August 8,  
297 2021, [www.rcsb.org](http://www.rcsb.org)). The residues in the Spike protein involved in binding to  
298 antibodies were identified by a distance of less than 4.5 Å between two counterparts  
299 in which van der Waals interactions occur. Deep mutational scanning results were  
300 obtained from [https://jbloomlab.github.io/SARS2\\_RBD\\_Ab\\_escape\\_maps/](https://jbloomlab.github.io/SARS2_RBD_Ab_escape_maps/), which  
301 includes information on sites in the SARS-CoV-2 RBD where mutations reduce  
302 binding by antibodies/sera [22]. The escape score at each position was calculated as  
303 the mean of the scores of all antibodies belonging to the same class.

## 304 **Construction of the phylogenetic tree**

305 The amino acid sequences were converted from nucleotide sequences using MEGA-X  
306 (10.1.8) [34]. Phylogenetic construction was performed by IQ-TREE (1.6.12) [35].  
307 The GTR+F model was used for nucleotide sequences, while the Blosum62 model  
308 was used for amino acid sequences.

## 309 **TMRCA estimation**

310 The estimation of the time to the most recent common ancestor (TMRCA) and  
311 mutation rate was performed by BEAST (2.6.4) [36] using 108 sequences collected  
312 between November 13, 2021, and November 23, 2021. The HKY85 nucleotide  
313 substitution model and strict molecular clock were used.

## 314 Search for the closest sequences in the database

315 The distance of two SARS-CoV-2 sequences was represented by the mutation  
316 difference, which was calculated by an online tool at National Genomics Data Center,  
317 China National Center for Bioinformation  
318 <https://ngdc.cncb.ac.cn/ncov/online/tool/genome-tracing/?lang=en>. Publicly available  
319 SARS-CoV-2 sequences were downloaded from the GISAID, NCBI, and RCoV19  
320 databases (November 1, 2021) [1,37].

## 321 Calculation of linkage disequilibrium

322 The  $r^2$  statistic was used to measure the strength of the linkage disequilibrium  
323 between each pair of mutations [38]. The calculation of linkage disequilibrium was  
324 based on all unique haplotypes from the public database.

325

## 326 CRediT author statement

327 **Wentai Ma:** Methodology, Formal analysis, and Writing. **Jing Yang:** Methodology,  
328 Formal analysis, and Writing. **Haoyi Fu:** Methodology, Formal analysis. **Chao Su:**  
329 Methodology, Formal analysis. **Caixia Yu:** Resources. **Qihui Wang:** Methodology.  
330 **Ana Tereza Ribeiro de Vasconcelos:** Resources, Writing. **Georgii A. Bazykin:**  
331 Resources, Writing. **Yiming Bao:** Methodology, Writing. **Mingkun Li:**  
332 Conceptualization, Methodology, Supervision, Writing. All authors have read and  
333 approved the final manuscript.

## 334 Acknowledgments

335 We thank Dr. Jennifer Giandhari, Dr. Eduan Wilkinson, and Dr. Tulio de Oliveira  
336 from Centre for Epidemic Response and Innovation (CERI), Stellenbosch University  
337 for sharing the data and workflow, GISAID and associated laboratories and  
338 researchers for the shared sequence information, Dr. Aiping Wu from Suzhou Institute  
339 of Systems Medicine, Chinese Academy of Medical Sciences, for help in the  
340 phylogenetic tree analysis. This study was funded by the National Natural Science  
341 Foundation of China (Grant No. 82161148009), the Strategic Priority Research  
342 Program of Chinese Academy of Sciences, China (Grant No. XDB38030400), The  
343 Capital Health Development and Research of Special (Grant No. 2021-1G-3012),  
344 Conselho Nacional de desenvolvimento Científico e Tecnológico (CNPq) -

345 NGS-BRICS - n°: 440931/2020-7, and Russian Foundation for Basic Research  
346 (RFBR) (Grant No. 20-54-80014.

### 347 **Competing interests**

348 The authors declare that they have no competing interests.

### 349 **ORCID**

350 0000-0003-1931-8687 (Wentai Ma)

351 0000-0002-3934-7883 (Jing Yang)

352 0000-0001-9696-5445 (Haoyi Fu)

353 0000-0002-5824-7968 (Chao Su)

354 0000-0002-3882-9979 (Caixia Yu)

355 0000-0003-3768-0401 (Qihui Wang)

356 0000-0002-4632-2086 (Ana Tereza Ribeiro de Vasconcelos)

357 0000-0003-2334-2751 (Georgii A. Bazykin)

358 0000-0002-9922-9723 (Yiming Bao)

359 0000-0003-1041-1172 (Mingkun Li)

### 360 **References**

- 361 [1] Elbe S, Buckland-Merrett G. Data, disease and diplomacy: GISAID's  
362 innovative contribution to global health. *Glob challenges (Hoboken, NJ)*  
363 2017;1: 33–46.
- 364 [2] Viana R, Moyo S, Amoako DG, et al. Rapid epidemic expansion of the  
365 SARS-CoV-2 Omicron variant in southern Africa. *medRxiv*  
366 2021;2021.12.19.21268028.
- 367 [3] Lista MJ, Winstone H, Wilson HD, et al. The P681H mutation in the Spike  
368 glycoprotein confers Type I interferon resistance in the SARS-CoV-2 alpha  
369 (B.1.1.7) variant. *bioRxiv*. Epub ahead of print 2021. DOI:  
370 10.1101/2021.11.09.467693.
- 371 [4] Cele S, Jackson L, Khoury DS, et al. Omicron extensively but incompletely  
372 escapes Pfizer BNT162b2 neutralization. *Nature*. Epub ahead of print 2021.  
373 DOI: doi.org/10.1038/d41586-021-03824-5.
- 374 [5] Pulliam J. Increased risk of SARS-CoV-2 reinfection associated with  
375 emergence of the Omicron variant in South Africa. *medRxiv* 2021;1–43.

- 376 [6] Wilkinson E, Giovanetti M, Tegally H, et al. A year of genomic surveillance  
377 reveals how the SARS-CoV-2 pandemic unfolded in Africa. *Science* 2021;374:  
378 423–431.
- 379 [7] Zhang Z, Li J, Zhao X-Q, et al. KaKs\_Calculator: calculating Ka and Ks  
380 through model selection and model averaging. *Genomics Proteomics  
381 Bioinformatics* 2006;4: 259–263.
- 382 [8] Temmam S, Salazar EB, Munier S, et al. Coronaviruses with a  
383 SARS-CoV-2-like receptor- binding domain allowing ACE2-mediated entry  
384 into human cells isolated from bats of Indochinese peninsula. *Res Sq*. Epub  
385 ahead of print 2021. DOI: 10.21203/rs.3.rs-871965/v1.
- 386 [9] Zhou P, Yang X-L, Wang X-G, et al. A pneumonia outbreak associated with a  
387 new coronavirus of probable bat origin. *Nature* 2020;579: 270–273.
- 388 [10] Liu P, Jiang J-Z, Wan X-F, et al. Are pangolins the intermediate host of the  
389 2019 novel coronavirus (SARS-CoV-2)? *PLoS Pathog* 2020;16: e1008421.
- 390 [11] Lam TT-Y, Jia N, Zhang Y-W, et al. Identifying SARS-CoV-2-related  
391 coronaviruses in Malayan pangolins. *Nature* 2020;583: 282–285.
- 392 [12] Wu F, Zhao S, Yu B, et al. A new coronavirus associated with human  
393 respiratory disease in China. *Nature* 2020;579: 265–269.
- 394 [13] Wang Q, Zhang Y, Wu L, et al. Structural and Functional Basis of  
395 SARS-CoV-2 Entry by Using Human ACE2. *Cell* 2020;181: 894-904.e9.
- 396 [14] Laffebber C, de Koning K, Kanaar R, et al. Experimental Evidence for  
397 Enhanced Receptor Binding by Rapidly Spreading SARS-CoV-2 Variants. *J  
398 Mol Biol* 2021;433: 167058.
- 399 [15] Liu Y, Liu J, Plante KS, et al. The N501Y spike substitution enhances  
400 SARS-CoV-2 infection and transmission. *Nature*. Epub ahead of print  
401 November 2021. DOI: 10.1038/s41586-021-04245-0.
- 402 [16] Meng B, Kemp SA, Papa G, et al. Recurrent emergence of SARS-CoV-2 spike  
403 deletion H69/V70 and its role in the Alpha variant B.1.1.7. *Cell Rep* 2021;35:  
404 109292.
- 405 [17] Lubinski B, Fernandes MH V, Frazier L, et al. Functional evaluation of the  
406 P681H mutation on the proteolytic activation the SARS-CoV-2 variant B . 1 .  
407 1 . 7 ( Alpha ) spike. *bioRxiv* 2021;1–28.
- 408 [18] Wu H, Xing N, Meng K, et al. Nucleocapsid mutations R203K/G204R increase  
409 the infectivity, fitness, and virulence of SARS-CoV-2. *Cell Host Microbe*  
410 2021;29: 1788-1801.e6.
- 411 [19] Hastie KM, Li H, Bedinger D, et al. Defining variant-resistant epitopes targeted  
412 by SARS-CoV-2 antibodies: A global consortium study. *Science* 2021;374:  
413 472–478.
- 414 [20] Wilhelm A, Widera M, Grikscheit K, et al. Reduced Neutralization of

- 415 SARS-CoV-2 Omicron Variant by Vaccine Sera and Monoclonal Antibodies.  
416 *medRxiv*. Epub ahead of print 2021. DOI: 10.1101/2021.12.07.21267432.
- 417 [21] Cao Y, Wang J, Jian F, et al. Omicron escapes the majority of existing  
418 SARS-CoV-2 neutralizing antibodies. *Nature*. Epub ahead of print 2021. DOI:  
419 doi.org/10.1038/d41586-021-03796-6.
- 420 [22] Greaney AJ, Starr TN, Barnes CO, et al. Mapping mutations to the  
421 SARS-CoV-2 RBD that escape binding by different classes of antibodies. *Nat*  
422 *Commun* 2021;12: 4196.
- 423 [23] Barnes CO, Jette CA, Abernathy ME, et al. SARS-CoV-2 neutralizing antibody  
424 structures inform therapeutic strategies. *Nature* 2020;588: 682–687.
- 425 [24] Choi B, Choudhary MC, Regan J, et al. Persistence and Evolution of  
426 SARS-CoV-2 in an Immunocompromised Host. *The New England journal of*  
427 *medicine* 2020;383: 2291–2293.
- 428 [25] Kemp SA, Collier DA, Datir RP, et al. SARS-CoV-2 evolution during  
429 treatment of chronic infection. *Nature* 2021;592: 277–282.
- 430 [26] Oude Munnink BB, Sikkema RS, Nieuwenhuijse DF, et al. Transmission of  
431 SARS-CoV-2 on mink farms between humans and mink and back to humans.  
432 *Science* 2021;371: 172–177.
- 433 [27] Wei C, Shan K-J, Wang W, et al. Evidence for a mouse origin of the  
434 SARS-CoV-2 Omicron variant. *J Genet Genomics*. Epub ahead of print  
435 Desember 2021. DOI: 10.1016/j.jgg.2021.12.003.
- 436 [28] Kupferschmidt K. Where did “weird” Omicron come from? *Science (New York,*  
437 *N.Y.)* 2021;374: 1179.
- 438 [29] Rambaut A, Holmes EC, O’Toole Á, et al. A dynamic nomenclature proposal  
439 for SARS-CoV-2 lineages to assist genomic epidemiology. *Nat Microbiol*  
440 2020;5: 1403–1407.
- 441 [30] Chen S, Zhou Y, Chen Y, et al. fastp: an ultra-fast all-in-one FASTQ  
442 preprocessor. *Bioinformatics* 2018;34: i884–i890.
- 443 [31] Li H. Minimap2: pairwise alignment for nucleotide sequences. *Bioinformatics*  
444 2018;34: 3094–3100.
- 445 [32] Li H, Handsaker B, Wysoker A, et al. The Sequence Alignment/Map format  
446 and SAMtools. *Bioinformatics* 2009;25: 2078–2079.
- 447 [33] Koboldt DC, Zhang Q, Larson DE, et al. VarScan 2: somatic mutation and  
448 copy number alteration discovery in cancer by exome sequencing. *Genome Res*  
449 2012;22: 568–576.
- 450 [34] Kumar S, Stecher G, Li M, et al. MEGA X: Molecular Evolutionary Genetics  
451 Analysis across Computing Platforms. *Mol Biol Evol* 2018;35: 1547–1549.
- 452 [35] Minh BQ, Schmidt HA, Chernomor O, et al. IQ-TREE 2: New Models and  
453 Efficient Methods for Phylogenetic Inference in the Genomic Era. *Mol Biol*



- 454 *Evol* 2020;37: 1530–1534.
- 455 [36] Bouckaert R, Vaughan TG, Barido-Sottani J, et al. BEAST 2.5: An advanced  
456 software platform for Bayesian evolutionary analysis. *PLoS Comput Biol*  
457 2019;15: e1006650.
- 458 [37] Song S, Ma L, Zou D, et al. The Global Landscape of SARS-CoV-2 Genomes,  
459 Variants, and Haplotypes in 2019nCoV. *Genomics Proteomics  
460 Bioinformatics* 2020;18: 749–759.
- 461 [38] Slatkin M. Linkage disequilibrium--understanding the evolutionary past and  
462 mapping the medical future. *Nat Rev Genet* 2008;9: 477–485.

463

464

## 465 **Figure legends**

### 466 **Figure 1 Sequence enrichment efficiency of the Omicron variant using different** 467 **protocols**

468 **A.** Distribution of the sequencing depth of the Omicron variant. The average  
469 sequencing depth is shown for each non-overlapping window of 100 bp after  
470 normalization by the total number of reads in the sample. The primers affected by the  
471 mutations in Omicron are labeled on top of the figure. **B.** The efficiency of each  
472 primer in amplifying the nucleic acids of the Omicron variant. The color represents  
473 the fold change of enrichment efficiency, calculated by the sum of the depth of all  
474 samples in this region divided by the expected value (assuming no differences among  
475 regions). The overlapping region of adjacent primers was excluded from the analysis.  
476 The Omicron mutations that located in the region where primers anneal to are labeled  
477 on the right of the primer ID.

478

### 479 **Figure 2. Mutations in the Omicron genome and its evolutionary relationship** 480 **with other variants and SARS-like coronaviruses.**

481 **A.** Summary of mutations in the Omicron genome. Each row represents a mutation,  
482 and changes in nucleotides and amino acids are marked on two sides of the heatmap.  
483 Mutations located in the sites critical for viral binding to the human receptor  
484 angiotensin-converting enzyme 2 (ACE2) are marked in red [13]. Mutations observed  
485 in the *Spike* gene of other variants of concern (VOCs) are listed on the left of the  
486 heatmap. **B.** Phylogenetic tree of five VOCs and SARS-like coronaviruses based on



the nucleotide sequences. **C.** Phylogenetic tree of five VOCs and SARS-like coronaviruses based on the amino acid sequences in the *Spike* gene. **D.** Phylogenetic tree of five VOCs and SARS-like coronaviruses based on the amino acid sequences in the RBD region. Two bat coronaviruses (Bat BANAL-20-52 and Bat RaTG3) whose genomes were most similar to SARS-CoV-2 [8,9], two pangolin coronaviruses (Pangolin MP789 and Pangolin GXP5L) [10,11], and sequences of other recently collected VOCs (EPI\_ISL\_6141707, EPI\_ISL\_6774033, EPI\_ISL\_6898988, EPI\_ISL\_6585201 for the Alpha, Beta, Gamma, and Delta variants, respectively. All sequences were collected in November 2021, and those collected in South Africa were preferred) were included in the analysis of the phylogenetic tree. The Wuhan-Hu-1 sequence is shown as the outgroup of the tree for better visualization [12]. The number of mutations relative to Wuhan-Hu-1 is listed on the right of the tree. Insertions or deletions of multiple bases were considered as a single mutation.

500

**Figure 3. Distribution of the Omicron mutations at the antibody binding positions.** **A.** The number of binding antibodies at the Omicron mutation sites. **B.** The escape score of the Omicron mutations estimated from deep mutational scanning. The escape score for each position was calculated as the mean of the scores of all antibodies belonging to the same class. All Omicron mutations were labeled on the figure.

507

**Figure 4. Evolutionary features of the Omicron variant.**

**A.** The phylogenetic tree of 108 Omicron sequences and their closest sequences in the database. Wuhan-Hu-1 is shown as the outgroup of the tree. The three closest sequences belonging to lineage B.1.1 are highlighted in orange. Nonsynonymous mutations are marked in red. **B.** The distribution of the number of differences between all haplotypes (nonredundant sequences) in the public database and their closest sequences. The minimum number of sequences required for a valid haplotype was set to 3. **C.** Correlation between different Omicron mutations. Only 54 Omicron lineage-specific mutations were included in the analysis. The color in the heatmap represents the linkage disequilibrium coefficient ( $r^2$ ) between mutations. The mutation rate and the number of sequences in the public database that possess the same

519 mutation are labeled on the left and bottom of the heatmap, respectively. A cross is  
520 labeled if the mutation was not observed in the public database.

521

## 522 **Supplementary material**

523 **Figure S1. The correlation of the major allele frequency between the Illumina**  
524 **protocol and the GridION protocol.**

525 Each dot represents a mutation (major allele frequency  $\geq 70\%$ ).

526 **Figure S2. The distribution of the Omicron mutations on the structure of the**  
527 **Spike protein (left) and the RBD region (right).**

528 **Table S1. The information of the data used in the study.**

A

## Illumina MiSeq (ARTIC V4 protocol)

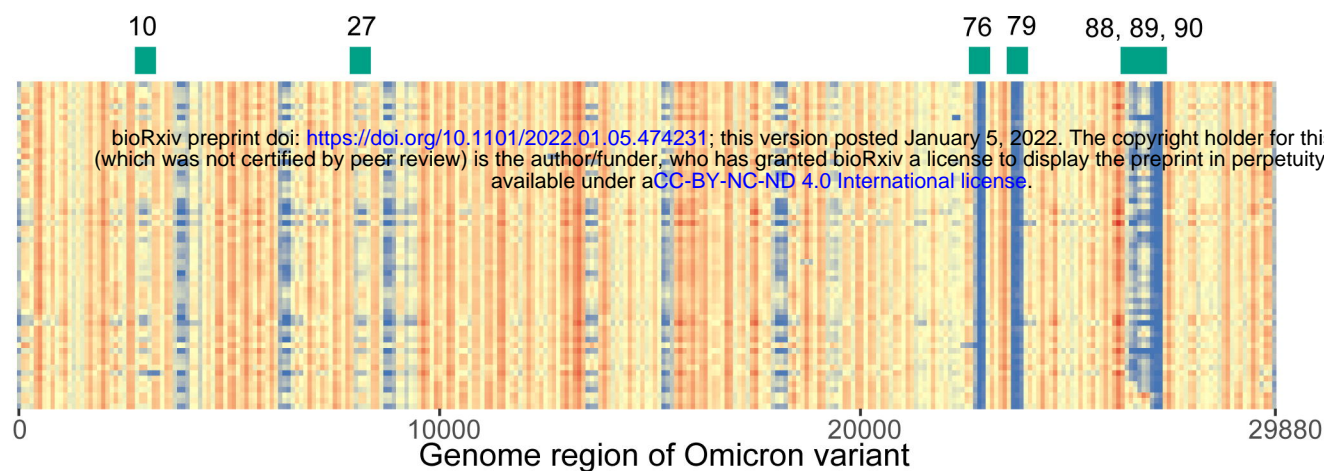

## Nanopore GridION (Midnight V6 protocol)

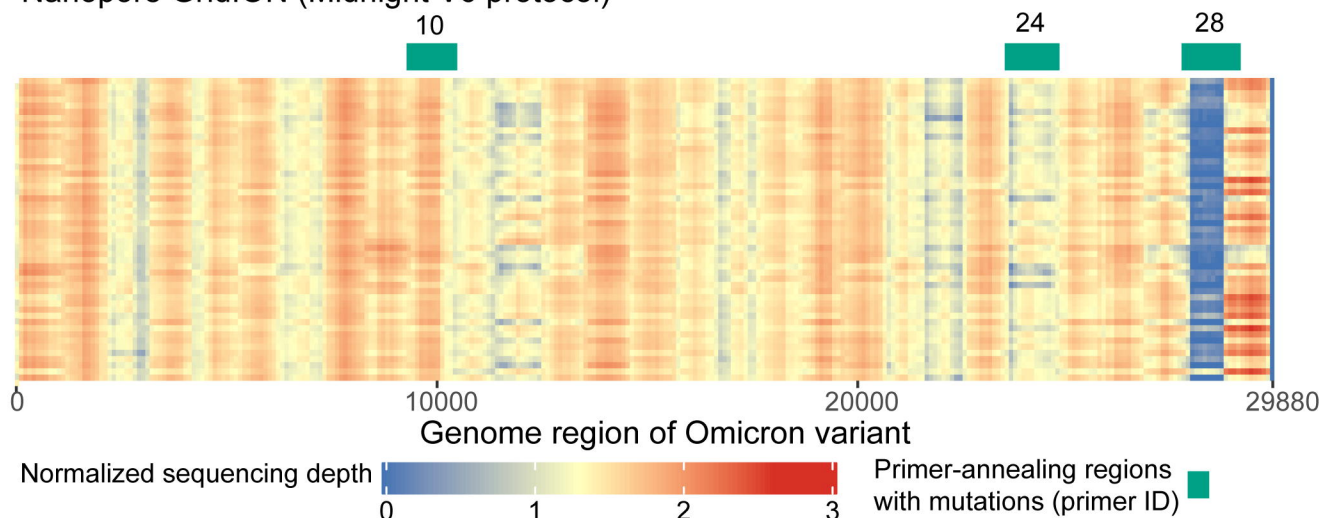

B

Nanopore GridION  
(Midnight V6 protocol)

Primer ID: region [mutation]

|                         |
|-------------------------|
| 1: 30-1205              |
| 2: 1100-2266            |
| 3: 2153-3257            |
| 4: 3144-4262            |
| 5: 4167-5359            |
| 6: 5257-6380            |
| 7: 6283-7401            |
| 8: 7298-8385            |
| 9: 8253-9400            |
| 10: 9303-10451 [10449]  |
| 11: 10343-11469         |
| 12: 11372-12560         |
| 13: 12450-13621         |
| 14: 13509-14641         |
| 15: 14540-15735         |
| 16: 15608-16720         |
| 17: 16624-17754         |
| 18: 17622-18706         |
| 19: 18596-19678         |
| 20: 19574-20698         |
| 21: 20553-21642         |
| 22: 21532-22612         |
| 23: 22511-23631         |
| 24: 23518-24736 [23525] |
| 25: 24633-25790         |
| 26: 25690-26857         |
| 27: 26744-27894         |
| 28: 27784-29007 [27807] |
| 29: 28677-29790         |

## Illumina MiSeq (ARTIC V4 protocol)

Primer ID: region [mutation]

|                      |
|----------------------|
| 1: 25-431            |
| 2: 324-727           |
| 3: 644-1044          |
| 4: 944-1362          |
| 5: 1245-1650         |
| 6: 1540-1948         |
| 7: 1851-2250         |
| 8: 2154-2571         |
| 9: 2483-2885         |
| 10: 2826-3210 [2832] |
| 11: 3078-3492        |
| 12: 3390-3794        |
| 13: 3683-4093        |
| 14: 3992-4409        |
| 15: 4312-4710        |
| 16: 4620-5017        |
| 17: 4923-5331        |
| 18: 5230-5643        |
| 19: 5561-5957        |
| 20: 5867-6272        |
| 21: 6184-6582        |
| 22: 6478-6885        |
| 23: 6747-7148        |
| 24: 7057-7467        |
| 25: 7381-7770        |
| 26: 7672-8092        |
| 27: 7997-8395 [8393] |
| 28: 8304-8714        |
| 29: 8596-9013        |
| 30: 8919-9329        |
| 31: 9168-9564        |
| 32: 9470-9866        |
| 33: 9782-10176       |

Primer ID: region [mutation]

|                 |
|-----------------|
| 34: 10076-10491 |
| 35: 10393-10810 |
| 36: 10713-11116 |
| 37: 11000-11414 |
| 38: 11305-11720 |
| 39: 11624-12033 |
| 40: 11937-12339 |
| 41: 12234-12643 |
| 42: 12519-12920 |
| 43: 12831-13240 |
| 44: 13124-13528 |
| 45: 13463-13859 |
| 46: 13752-14144 |
| 47: 14045-14457 |
| 48: 14338-14743 |
| 49: 14647-15050 |
| 50: 14953-15358 |
| 51: 15214-15619 |
| 52: 15535-15941 |
| 53: 15855-16260 |
| 54: 16112-16508 |
| 55: 16386-16796 |
| 56: 16692-17105 |
| 57: 16986-17405 |
| 58: 17323-17711 |
| 59: 17615-18022 |
| 60: 17911-18328 |
| 61: 18244-18652 |
| 62: 18550-18961 |
| 63: 18869-19277 |
| 64: 19183-19586 |
| 65: 19485-19901 |
| 66: 19810-20216 |

Primer ID: region [mutation]

|                         |
|-------------------------|
| 67: 20090-20497         |
| 68: 20377-20792         |
| 69: 20677-21080         |
| 70: 20988-21387         |
| 71: 21294-21700         |
| 72: 21532-21933         |
| 73: 21865-22274         |
| 74: 22091-22503         |
| 75: 22402-22805         |
| 76: 22648-23057 [22673] |
| 77: 22944-23351 [22674] |
| 78: 23219-23635 [23040] |
| 79: 23553-23955 [23048] |
| 80: 23853-24258 [23055] |
| 81: 24171-24567         |
| 82: 24426-24836         |
| 83: 24750-25150         |
| 84: 25051-25461         |
| 85: 25331-25740         |
| 86: 25645-26050         |
| 87: 25951-26360         |
| 88: 26255-26661 [26270] |
| 89: 26564-26979 [26577] |
| 90: 26873-27283 [27259] |
| 91: 27152-27560         |
| 92: 27447-27855         |
| 93: 27700-28104         |
| 94: 27996-28416         |
| 95: 28190-28598         |
| 96: 28512-28914         |
| 97: 28827-29227         |
| 98: 29136-29534         |
| 99: 29452-29854         |

Log<sub>2</sub>FC of sequencing depth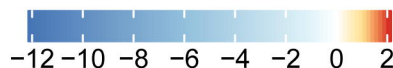



A

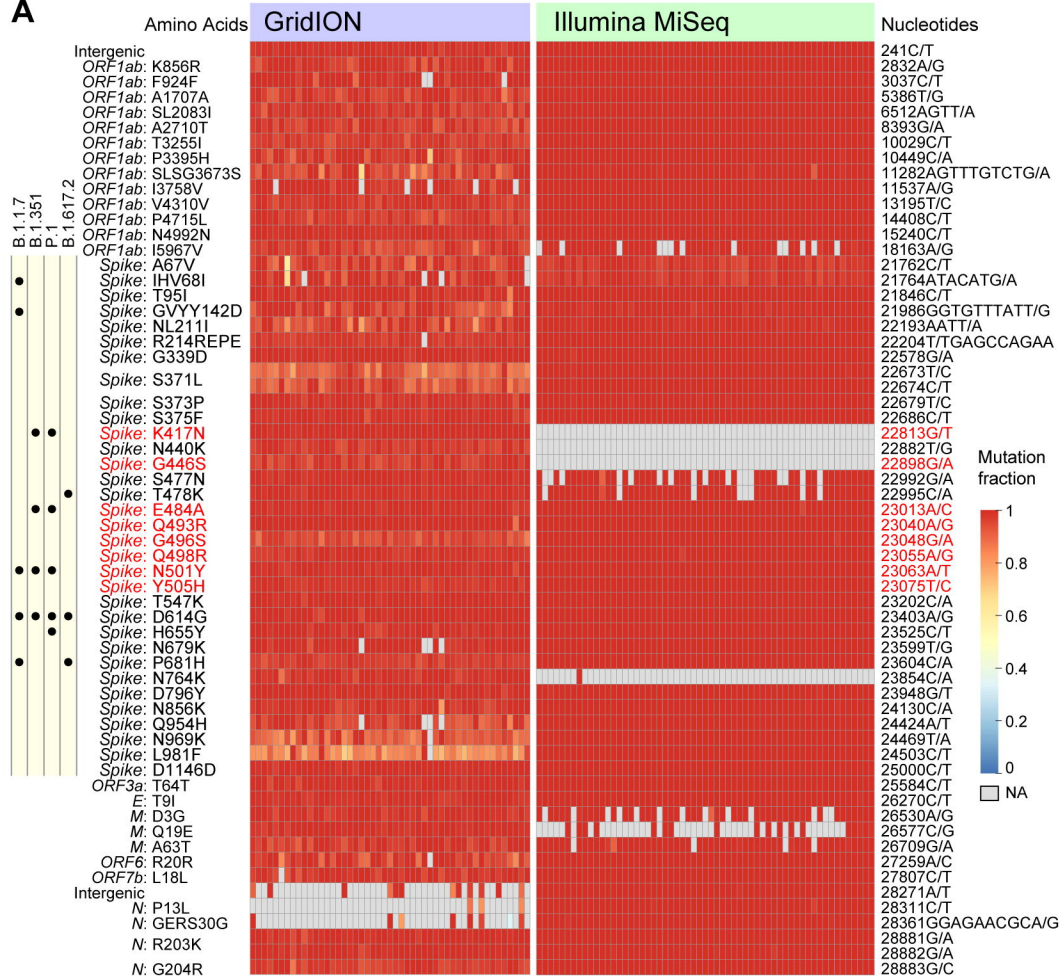

B

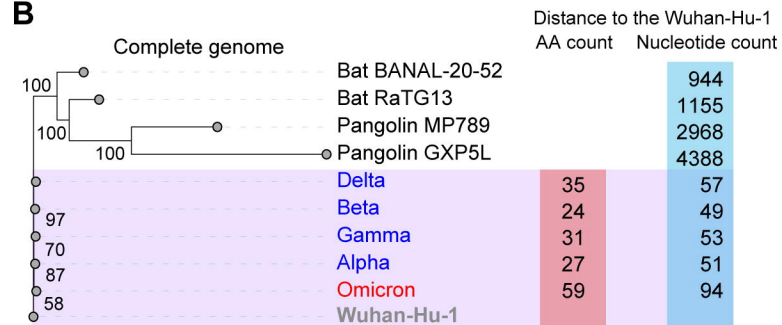

C

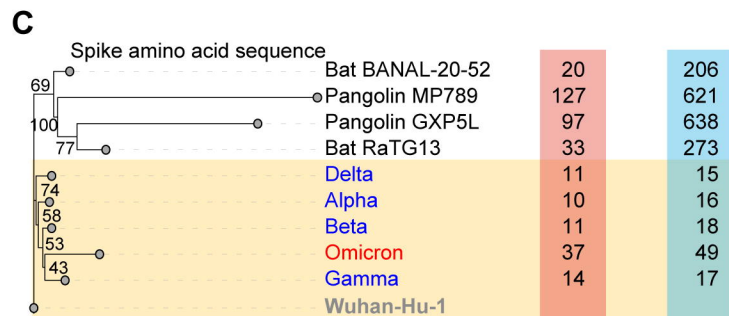

D

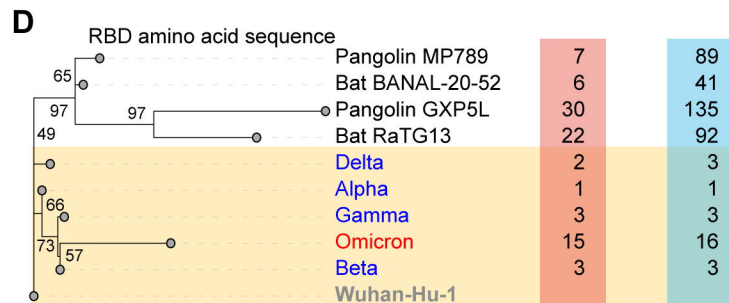

**A**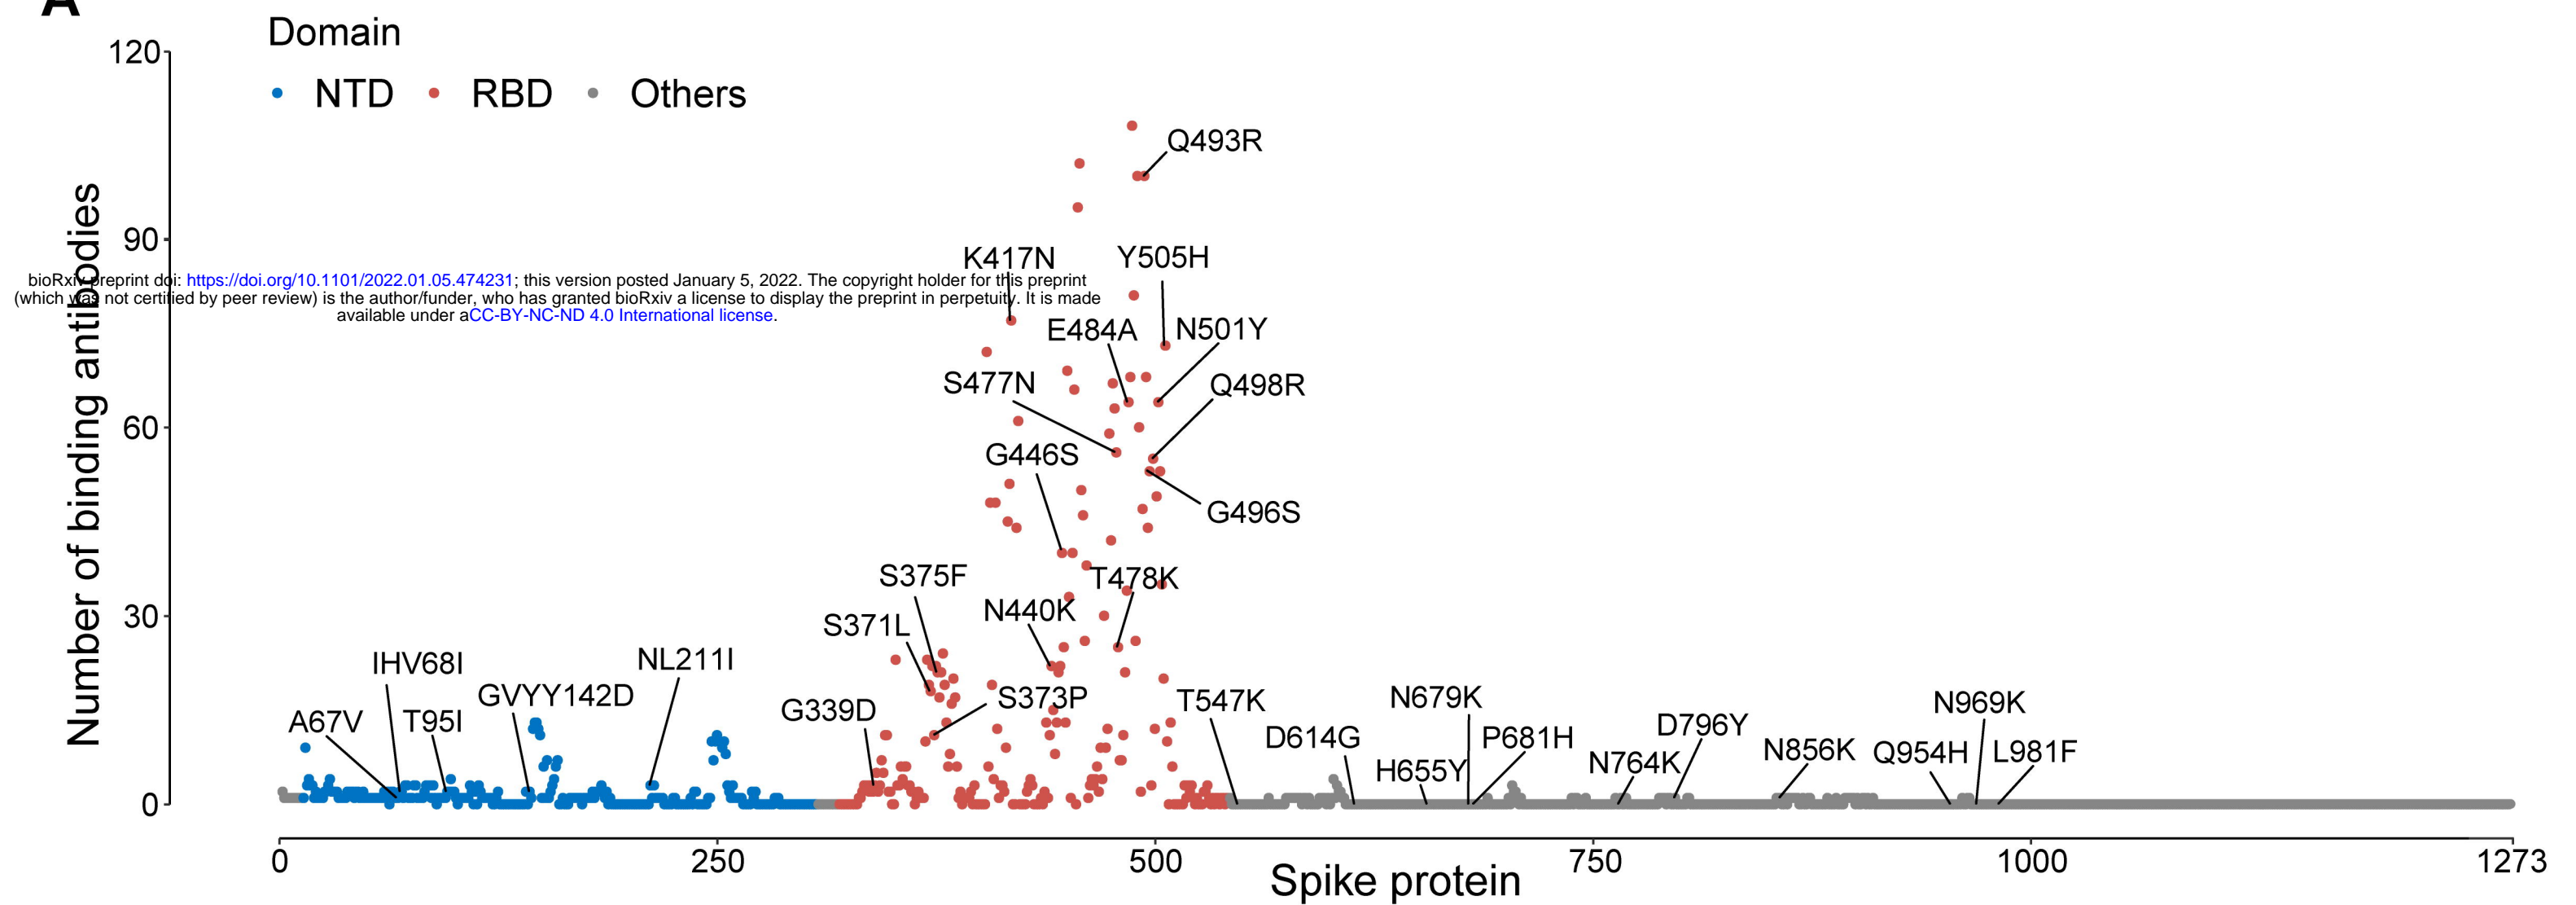**B**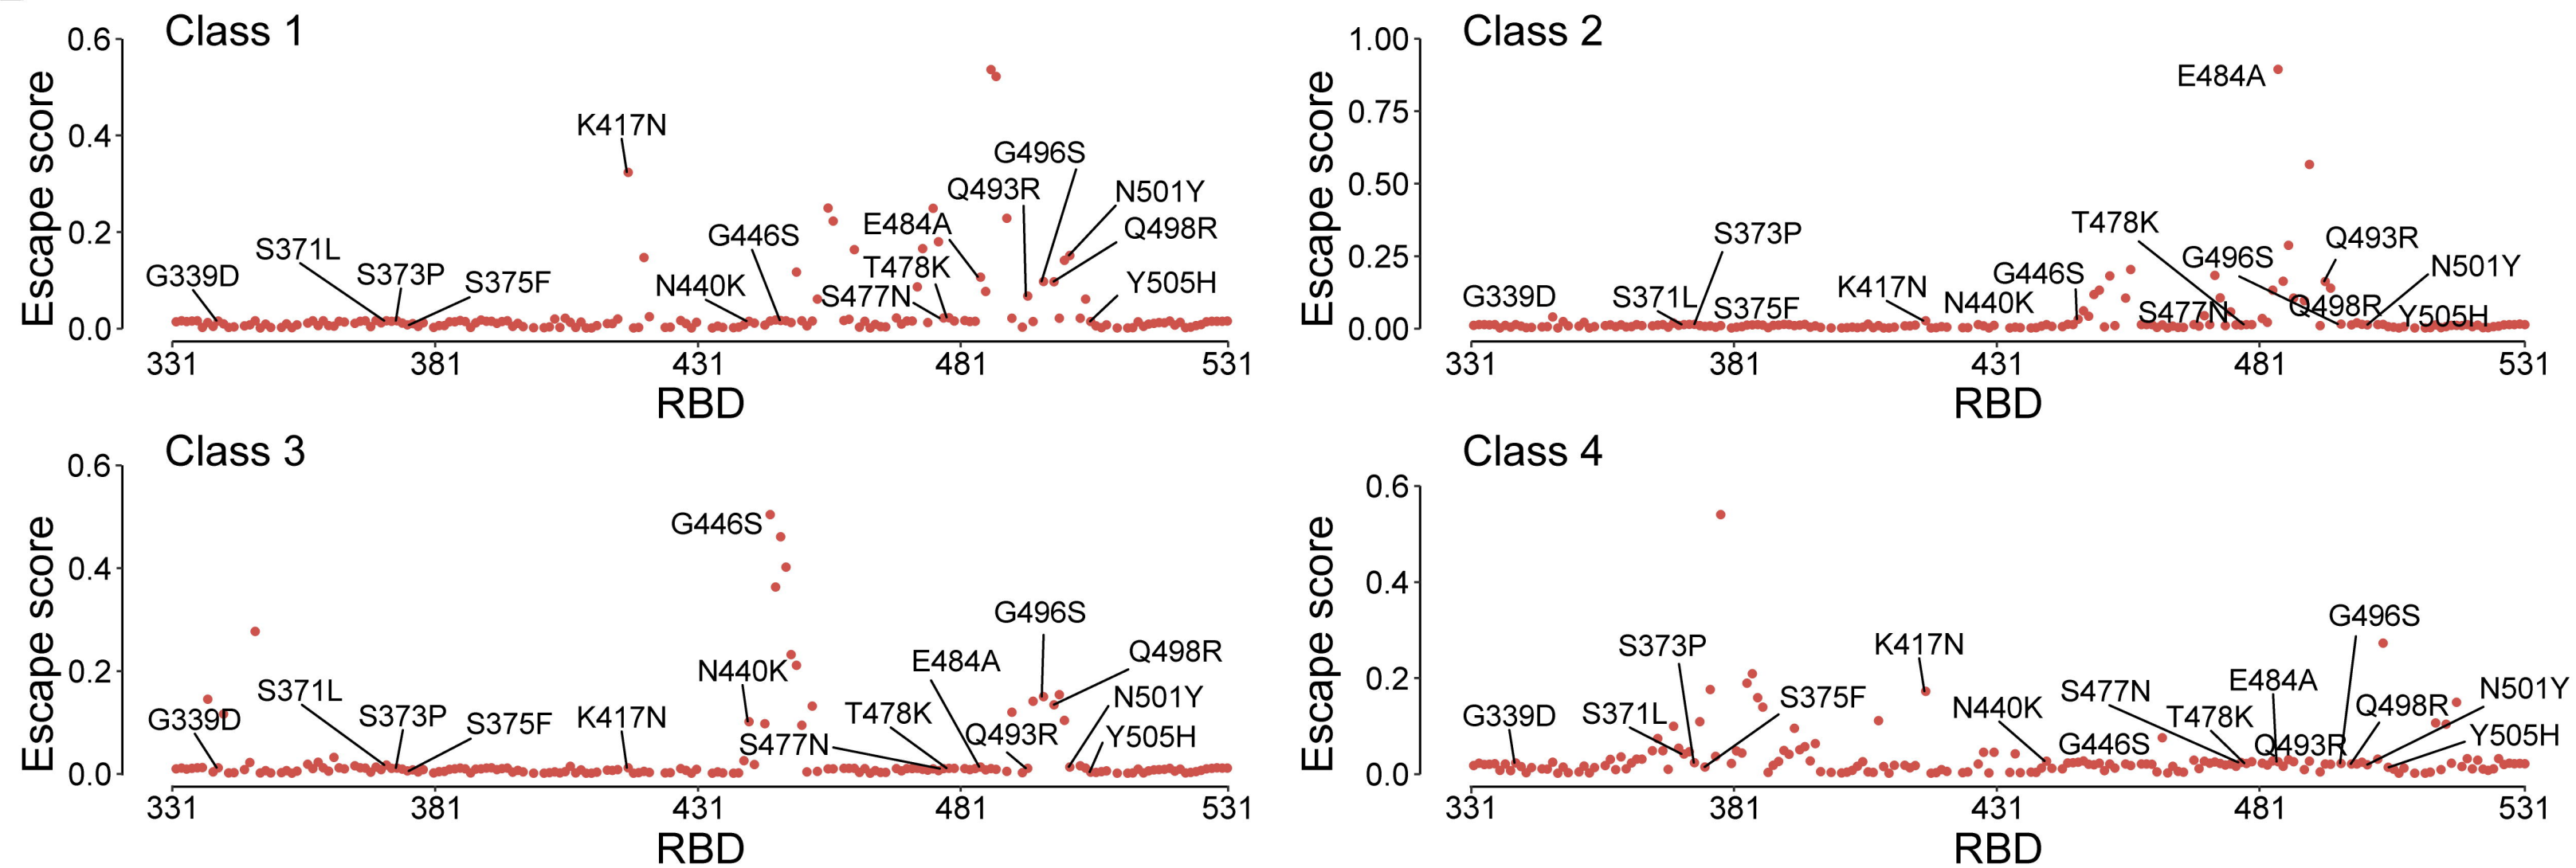



A

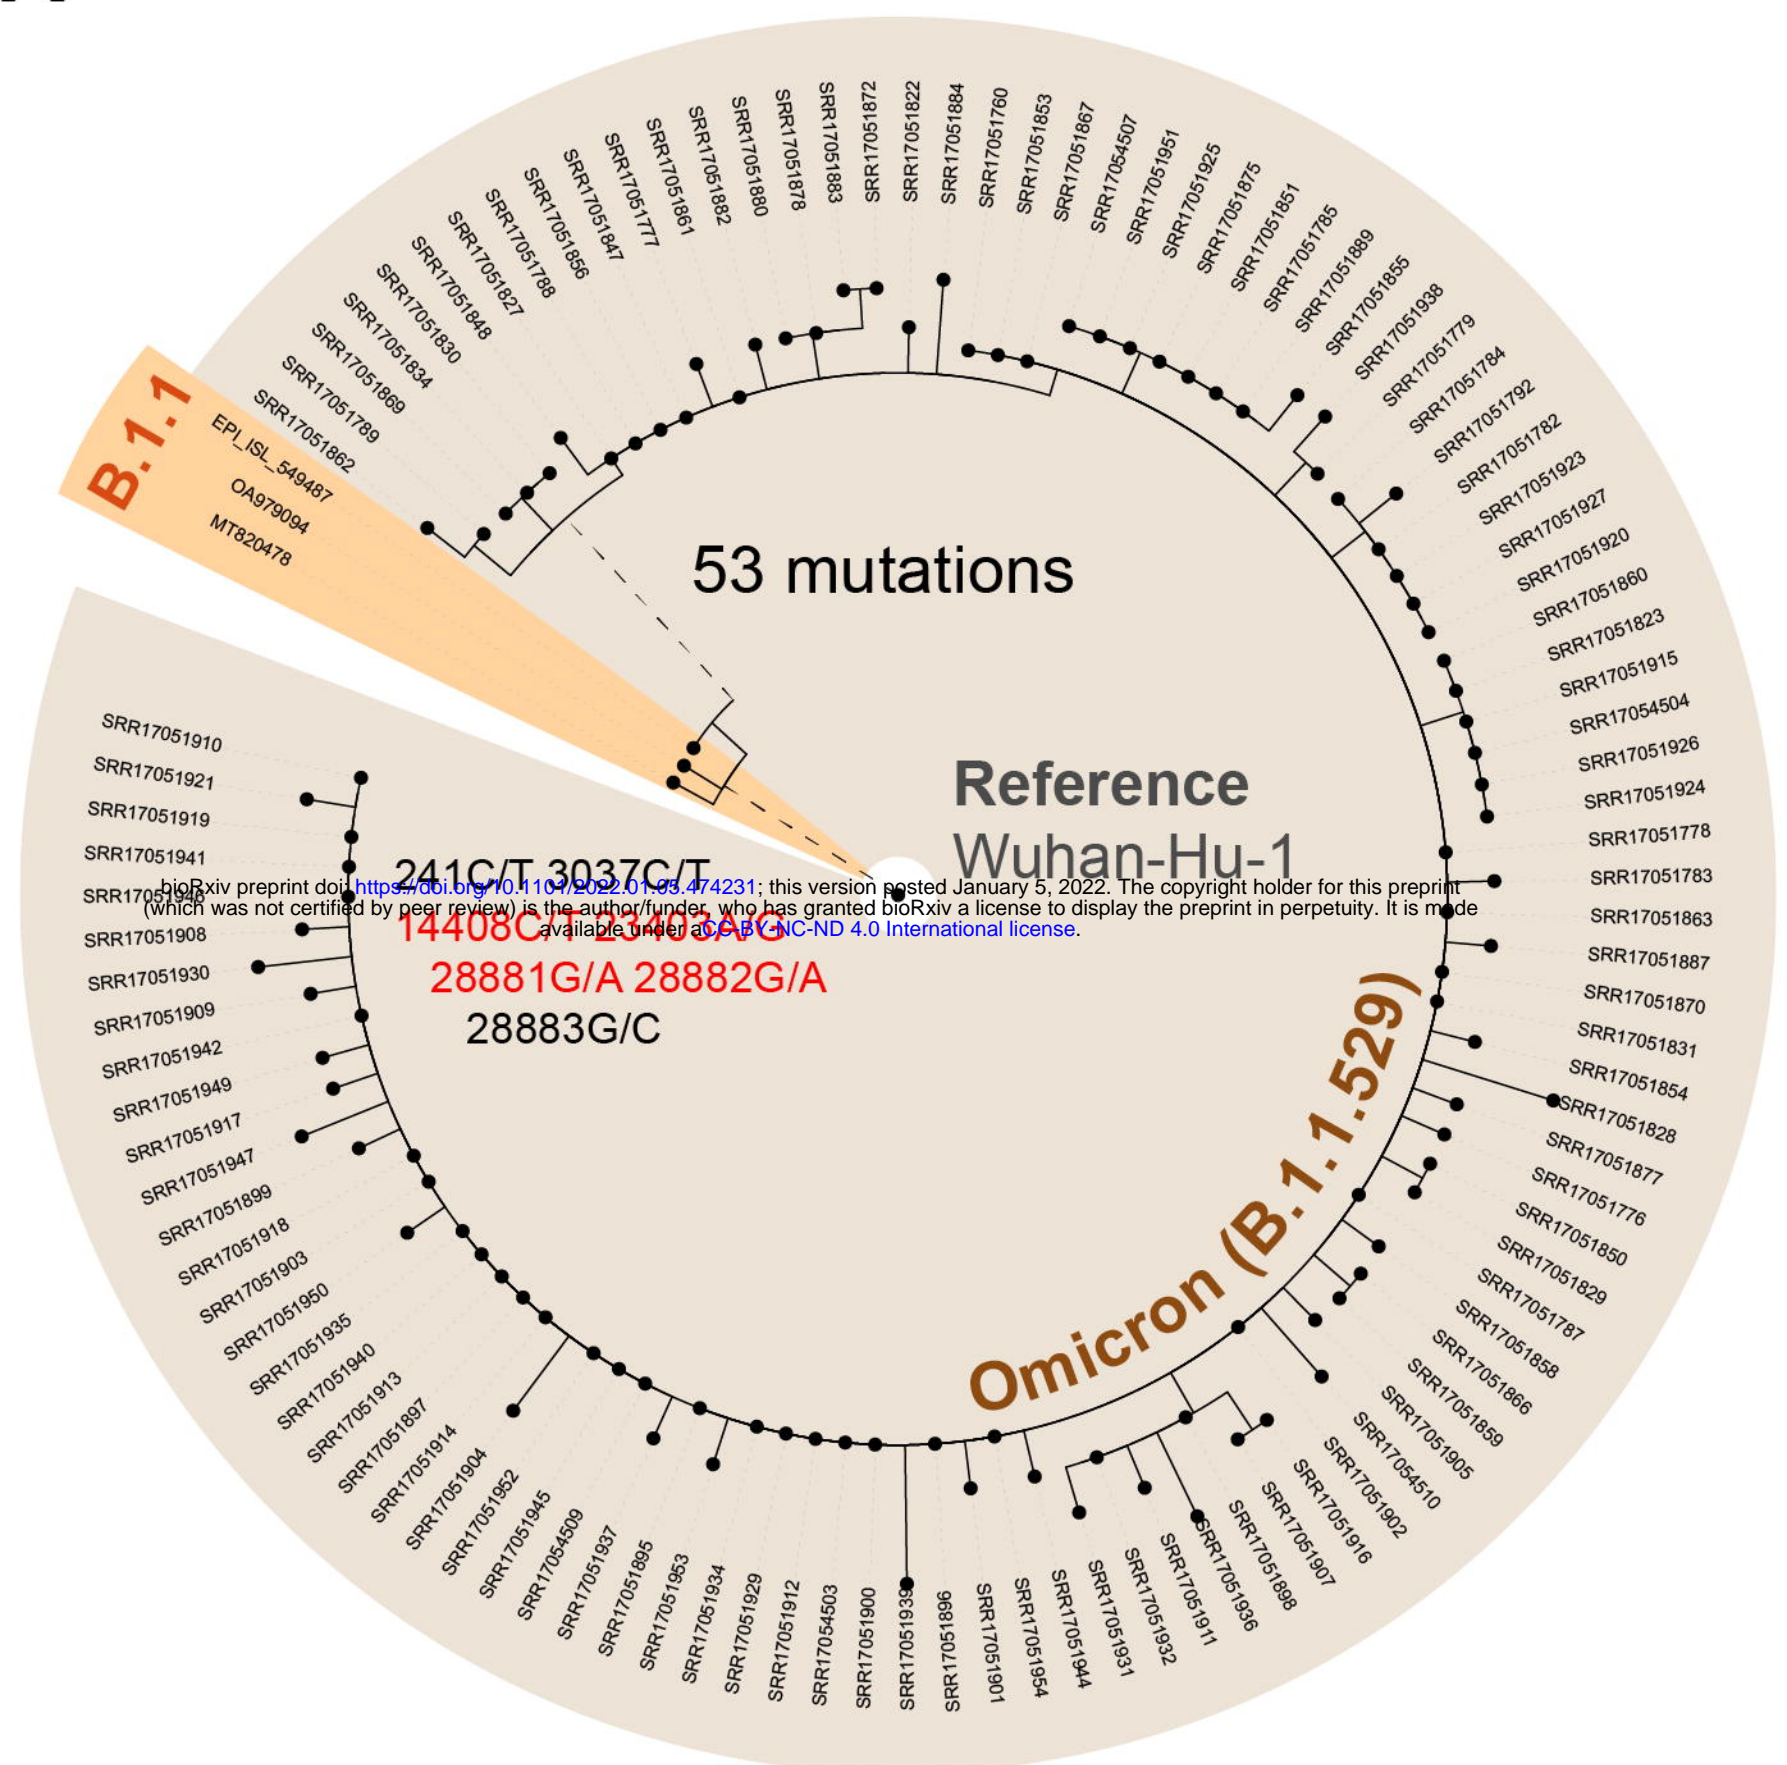

B

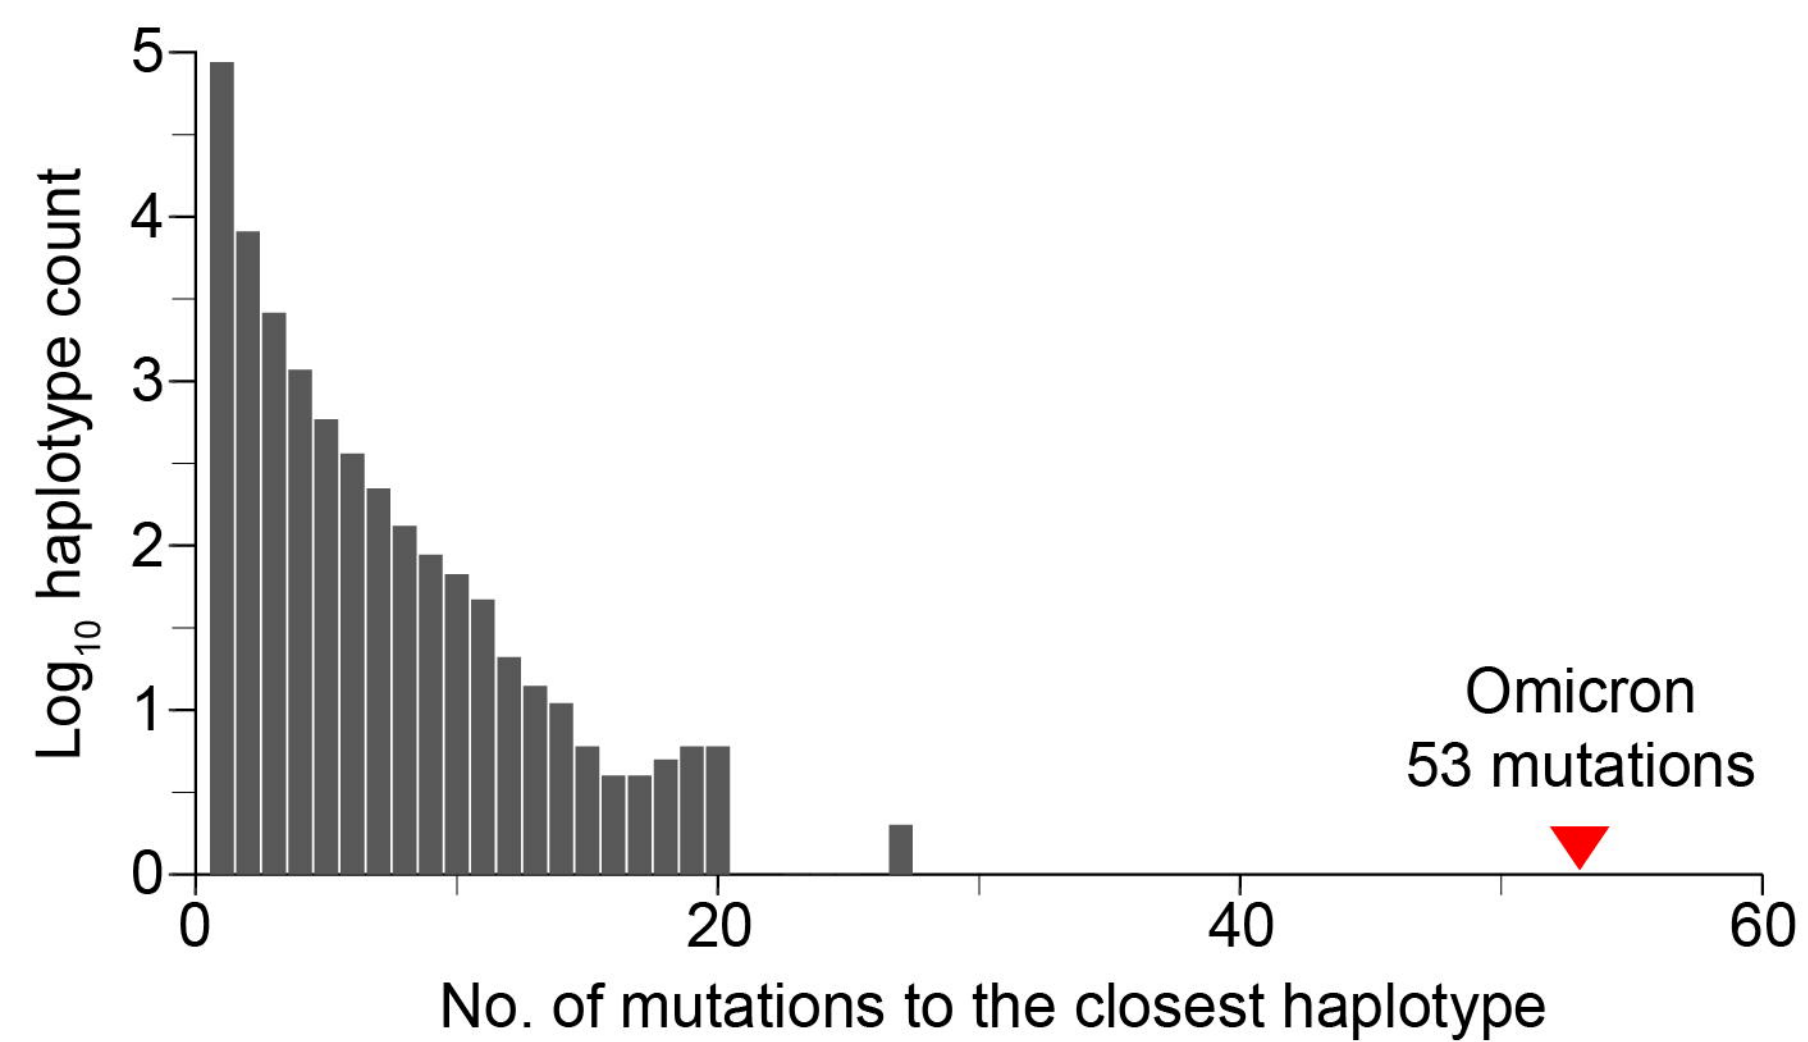

C

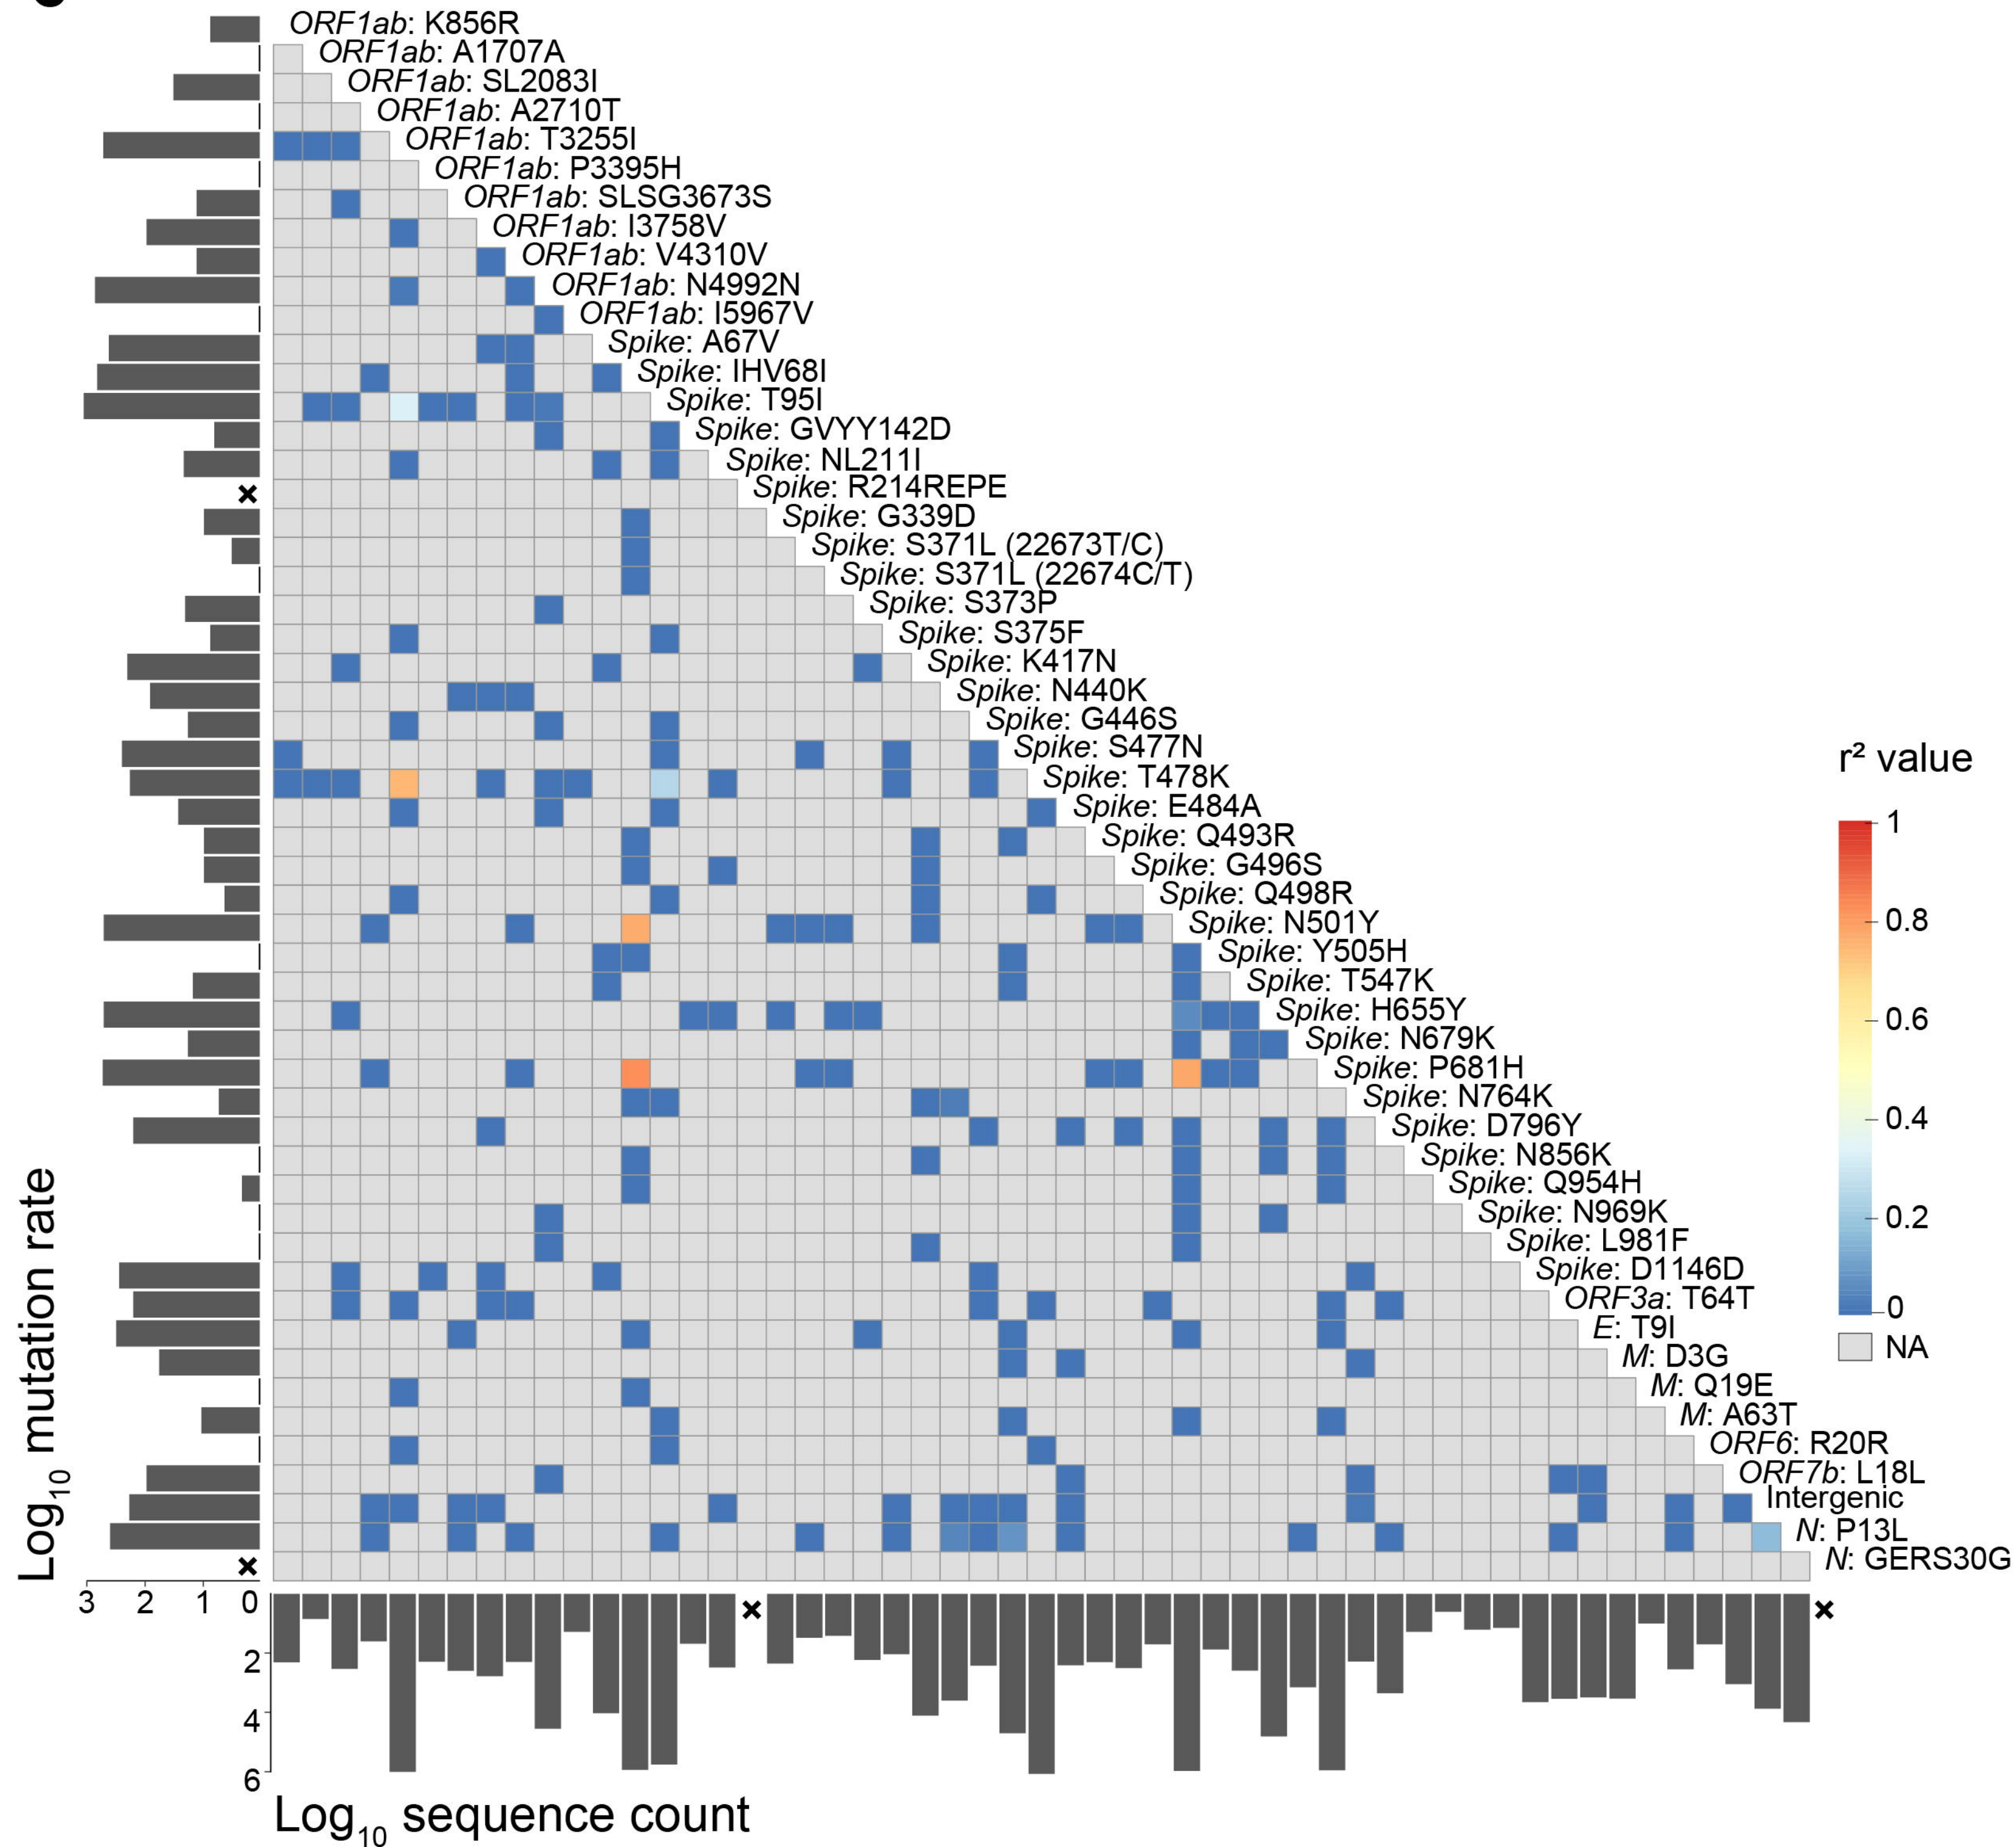

Source: https://www.biorxiv.org/content/10.1101/2022.01.05.474231v1.full.pdf
